# Supplementary material for: γ-P4S3I2: a new metal-free infrared second-order nonlinear optical crystal designed by polymorphism strategy
Source: Royal Society of Chemistry journal article supplement (doi:10.1039/d2qi02313j), 2022-12-19
Supplement: d2qi02313j1.pdf [file d2qi02313j1.pdf]

## Electronic Supplementary Information (ESI)

### $\gamma$ -P<sub>4</sub>S<sub>3</sub>I<sub>2</sub>: A New Metal-free Infrared Second-order Nonlinear Optical Crystal Designed by Polymorphism Strategy

Xin Zhao <sup>a,b</sup>, Chensheng Lin <sup>a</sup>, Shunda Yang <sup>a</sup>, Haotian Tian <sup>a,b</sup>, Chao Wang <sup>a,b</sup>, Tao Yan <sup>\*a,d</sup>,  
Jian Zhang <sup>d</sup>, Bingxuan Li <sup>a</sup>, Ning Ye <sup>c</sup> and Min Luo <sup>\*a</sup>

<sup>a</sup> Key Laboratory of Optoelectronic Materials Chemistry and Physics, Fujian Institute of Research on the Structure of Matter, Chinese Academy of Sciences, Fuzhou, Fujian 350002, China

E-mail: [lm8901@fjirsm.ac.cn](mailto:lm8901@fjirsm.ac.cn); [yantao@fjirsm.ac.cn](mailto:yantao@fjirsm.ac.cn)

<sup>b</sup> University of Chinese Academy of Sciences, Beijing 100049, China

<sup>c</sup> Tianjin Key Laboratory of Functional Crystal Materials, Institute of Functional Crystal, Tianjin University of Technology, Tianjin 300384, China

<sup>d</sup> State Key Laboratory of Crystal Materials, Shandong University, Jinan, 250100, China

## Table of Contents

| Sections   | Title                                                                                                                                                                                                                                                    | Page |
|------------|----------------------------------------------------------------------------------------------------------------------------------------------------------------------------------------------------------------------------------------------------------|------|
| Figure S1  | Calculated and experimental powder X-ray diffraction patterns of $\gamma$ -P <sub>4</sub> S <sub>3</sub> I <sub>2</sub>                                                                                                                                  | S3   |
| Figure S2  | Energy-dispersive X-ray Spectroscopy analysis of $\gamma$ -P <sub>4</sub> S <sub>3</sub> I <sub>2</sub>                                                                                                                                                  | S3   |
| Figure S3  | The experimental I...P distance in the (P <sub>4</sub> S <sub>3</sub> I <sub>2</sub> ) <sub>n</sub> (n=4) molecular cluster of $\gamma$ -P <sub>4</sub> S <sub>3</sub> I <sub>2</sub> (a) and $\alpha$ -P <sub>4</sub> S <sub>3</sub> I <sub>2</sub> (b) | S4   |
| Figure S4  | Powder X-ray diffraction patterns of $\gamma$ -P <sub>4</sub> S <sub>3</sub> I <sub>2</sub> before annealed and $\gamma$ -P <sub>4</sub> S <sub>3</sub> I <sub>2</sub> annealed at 125°C and recrystallized in CS <sub>2</sub>                           | S4   |
| Figure S5  | TG-DTA curves of $\gamma$ -P <sub>4</sub> S <sub>3</sub> I <sub>2</sub>                                                                                                                                                                                  | S5   |
| Figure S6  | UV-vis-NIR diffuse reflectance spectra of $\gamma$ -P <sub>4</sub> S <sub>3</sub> I <sub>2</sub> . Inset shows the derivation of band gap.                                                                                                               | S5   |
| Figure S7  | FT-IR transmittance spectra of $\gamma$ -P <sub>4</sub> S <sub>3</sub> I <sub>2</sub>                                                                                                                                                                    | S6   |
| Figure S8  | Calculated band structure of $\gamma$ -P <sub>4</sub> S <sub>3</sub> I <sub>2</sub>                                                                                                                                                                      | S6   |
| Figure S9  | Partial density of states (PDOS) of $\gamma$ -P <sub>4</sub> S <sub>3</sub> I <sub>2</sub>                                                                                                                                                               | S7   |
| Figure S10 | Calculated frequency-dependent coefficients of $\gamma$ -P <sub>4</sub> S <sub>3</sub> I <sub>2</sub>                                                                                                                                                    | S7   |
| Figure S11 | The calculated refractive index dispersion curves of $\gamma$ -P <sub>4</sub> S <sub>3</sub> I <sub>2</sub>                                                                                                                                              | S8   |
| Table S1   | Crystal Data and Structure Refinement Details of $\gamma$ -P <sub>4</sub> S <sub>3</sub> I <sub>2</sub>                                                                                                                                                  | S8   |
| Table S2   | Atomic coordinates ( $\times 10^4$ ) and equivalent isotropic displacement parameters ( $\text{\AA}^2 \times 10^3$ ) for $\gamma$ -P <sub>4</sub> S <sub>3</sub> I <sub>2</sub>                                                                          | S9   |
| Table S3   | Selected bond lengths [ $\text{\AA}$ ] and angles [deg.] for $\gamma$ -P <sub>4</sub> S <sub>3</sub> I <sub>2</sub>                                                                                                                                      | S10  |
| Table S4   | Anisotropic Displacement Parameters ( $\text{\AA}^2 \times 10^3$ ) for $\gamma$ -P <sub>4</sub> S <sub>3</sub> I <sub>2</sub>                                                                                                                            | S10  |
| Table S5   | Powder Laser Damage Threshold (LDT) Measurements                                                                                                                                                                                                         | S11  |

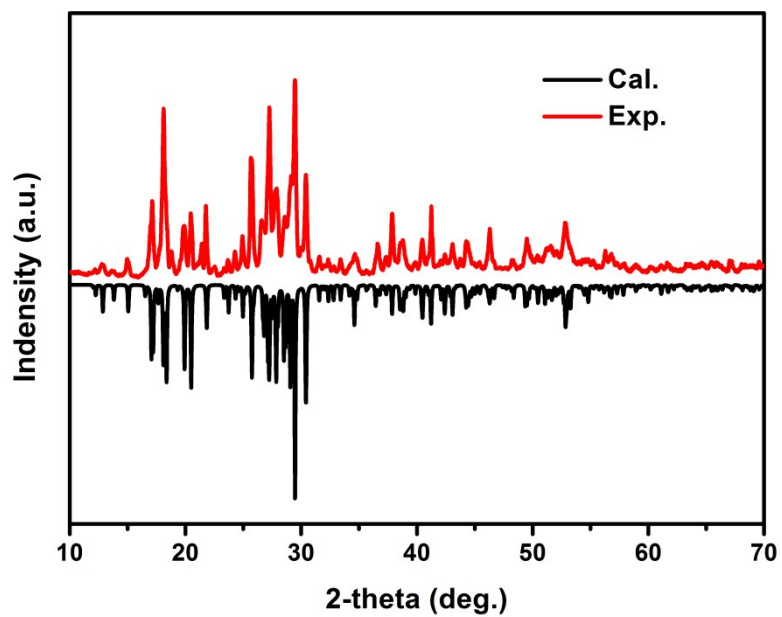

Figure S1 Calculated and experimental powder X-ray diffraction patterns of  $\gamma\text{-P}_4\text{S}_3\text{I}_2$ .

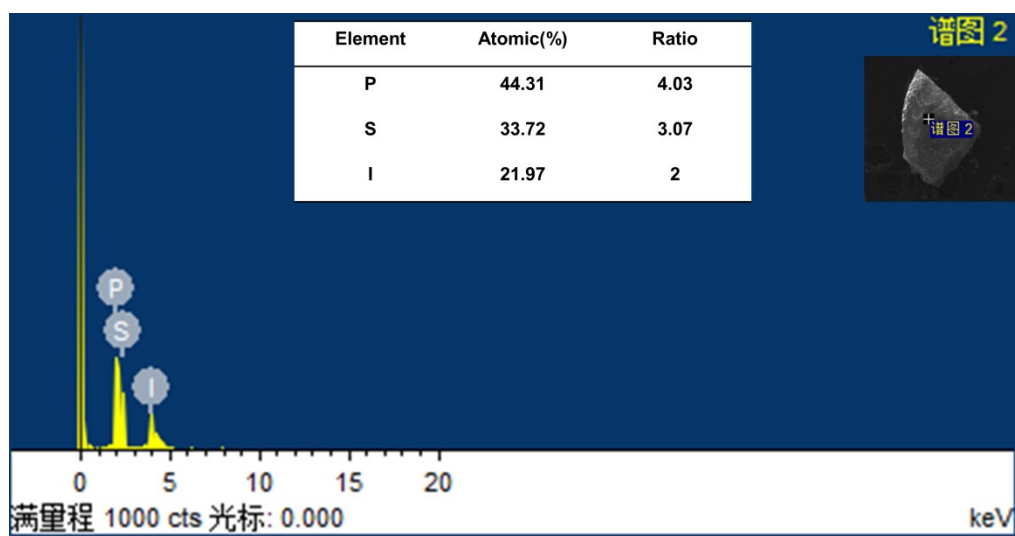

Figure S2 Energy-dispersive X-ray Spectroscopy analysis of  $\gamma\text{-P}_4\text{S}_3\text{I}_2$ .

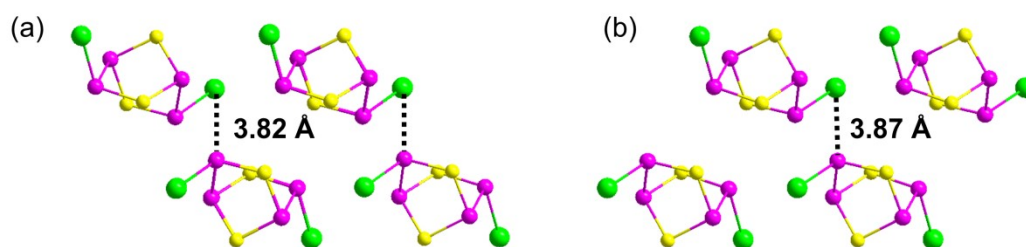

**Figure S3** The experimental I...P distance in the  $(P_4S_3I_2)_n$  ( $n=4$ ) molecular cluster of  $\gamma$ - $P_4S_3I_2$  (a) and  $\alpha$ - $P_4S_3I_2$  (b).

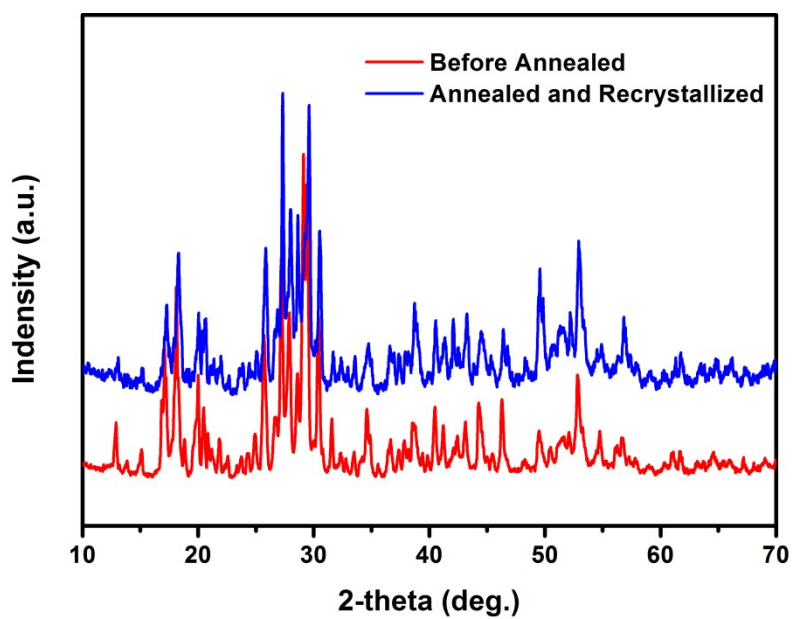

**Figure S4** Powder X-ray diffraction patterns of  $\gamma$ - $P_4S_3I_2$  before annealed and  $\gamma$ - $P_4S_3I_2$  annealed at 125°C and recrystallized in  $CS_2$ .

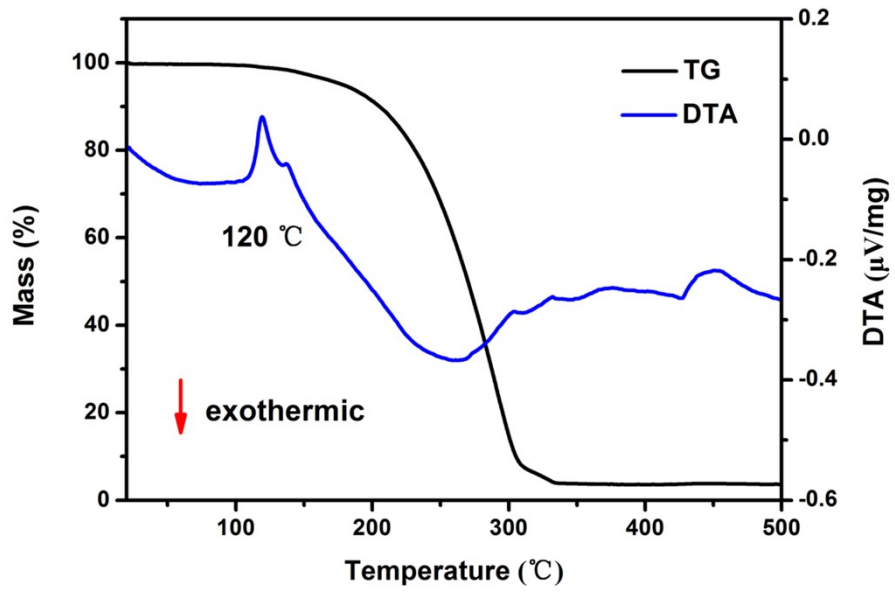

Figure S5 TG-DTA curves of  $\gamma$ - $P_4S_3I_2$ .

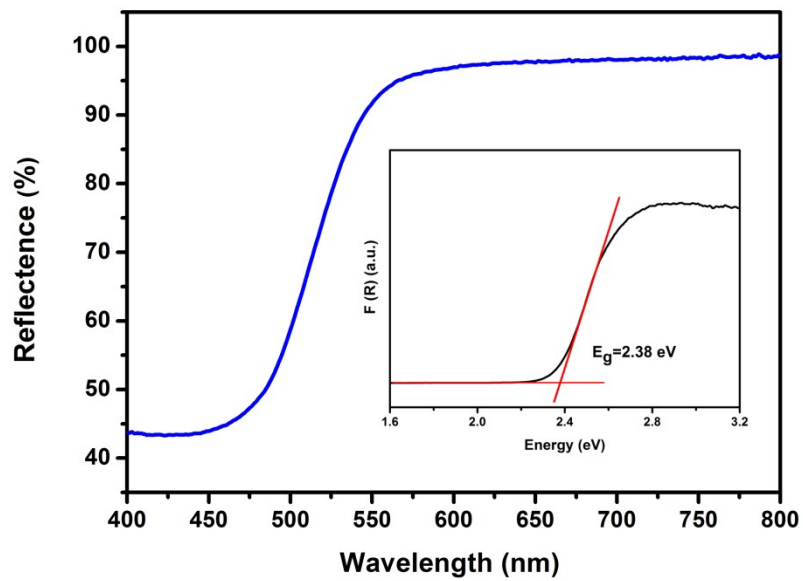

Figure S6 UV-vis-NIR diffuse reflectance spectra of  $\gamma$ - $P_4S_3I_2$ . Inset shows the derivation of band gap.

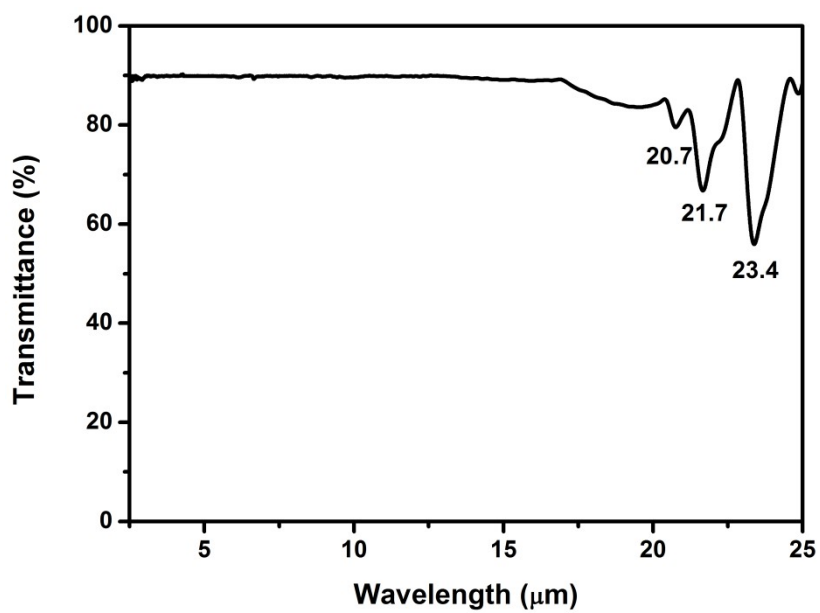

Figure S7 FT-IR transmittance spectra of  $\gamma\text{-P}_4\text{S}_3\text{I}_2$ .

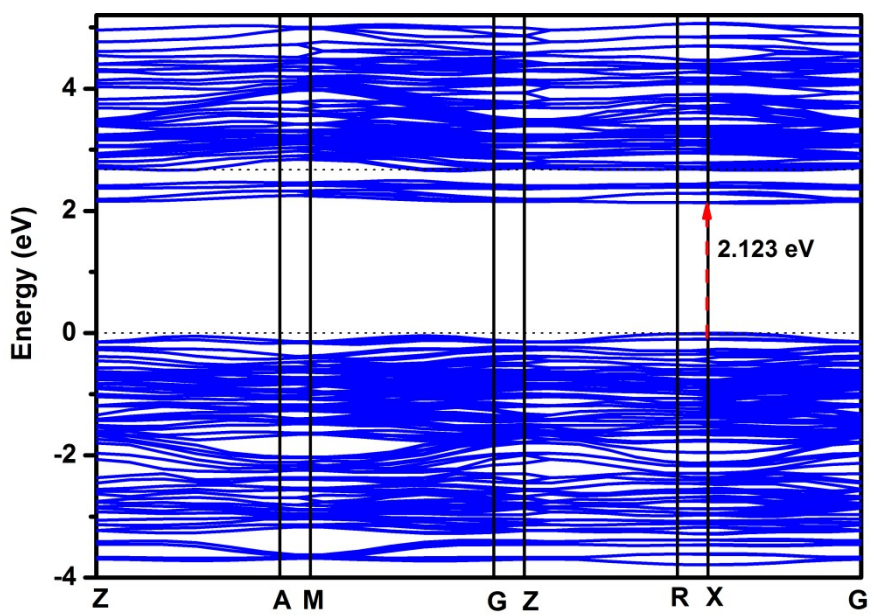

Figure S8 Calculated band structure of  $\gamma\text{-P}_4\text{S}_3\text{I}_2$ .

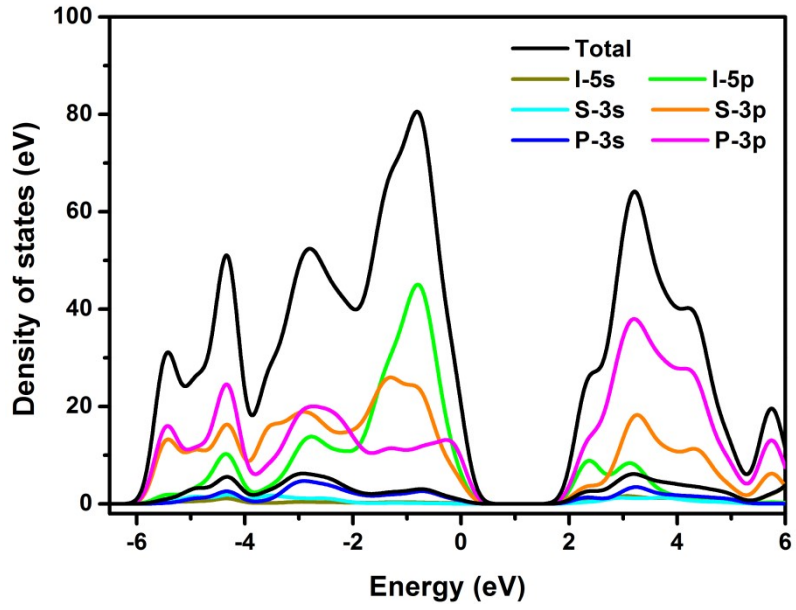

Figure S9 Partial density of states (PDOS) of  $\gamma$ - $P_4S_3I_2$ .

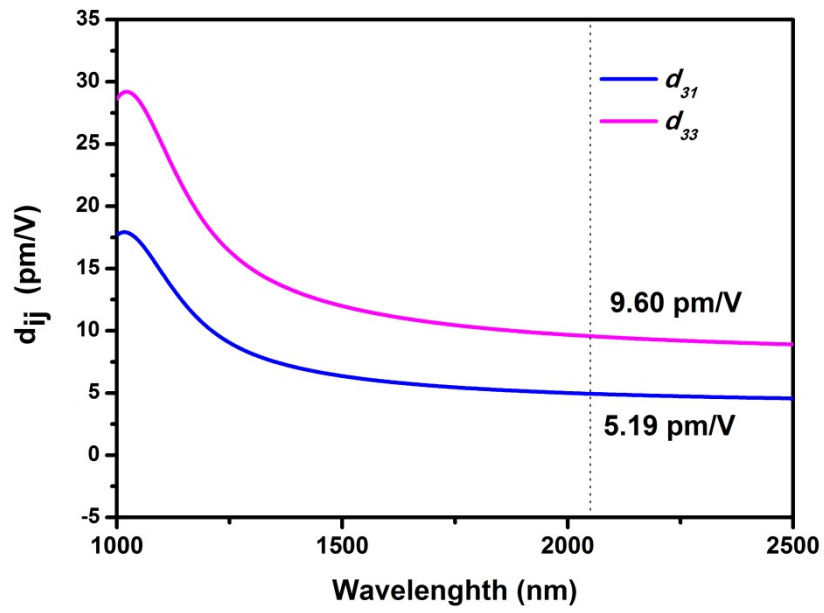

Figure S10 Calculated frequency-dependent coefficients of  $\gamma$ - $P_4S_3I_2$ .

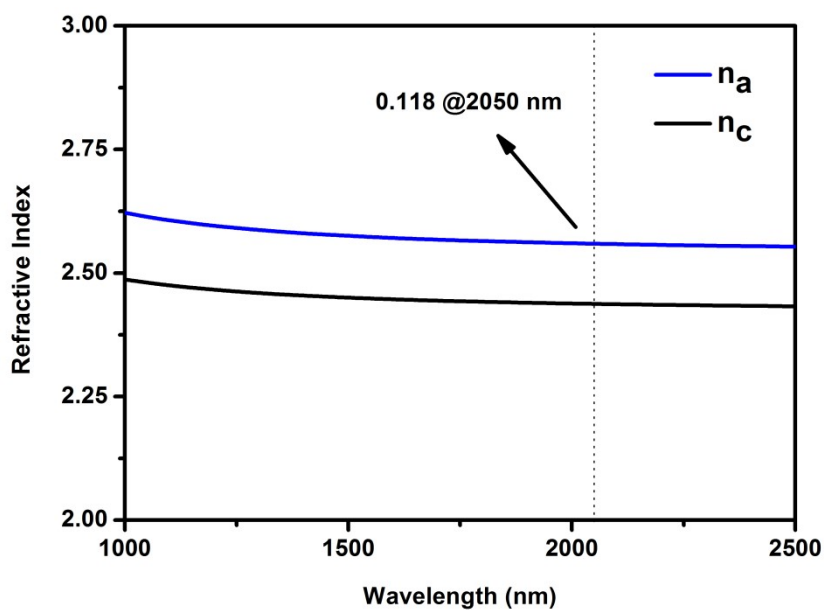

**Figure S11** The calculated refractive index dispersion curves of  $\gamma$ -P<sub>4</sub>S<sub>3</sub>I<sub>2</sub>.

**Table S1.** Crystal Data and Structure Refinement Details of  $\gamma$ -P<sub>4</sub>S<sub>3</sub>I<sub>2</sub><sup>a,b</sup>.

| Formula               | P <sub>4</sub> S <sub>3</sub> I <sub>2</sub> |
|-----------------------|----------------------------------------------|
| Formula weight (amu)  | 473.86                                       |
| Temperature (K)       | 293(2)                                       |
| $\lambda$ (Å)         | 0.71073                                      |
| Crystal system        | Tetragonal                                   |
| Space group           | P 4 <sub>3</sub>                             |
| $a$ (Å)               | 7.3415(2)                                    |
| $b$ (Å)               | 7.3415(2)                                    |
| $c$ (Å)               | 39.1942(19)                                  |
| $\alpha$ /°           | 90                                           |
| $\beta$ /°            | 90                                           |
| $\gamma$ /°           | 90                                           |
| $V$ (Å <sup>3</sup> ) | 2112.47(15)                                  |
| $Z$                   | 8                                            |



|                                           |                                    |
|-------------------------------------------|------------------------------------|
| $\rho_{\text{calc}}$ (Mg/m <sup>3</sup> ) | 2.980                              |
| $\mu$ (mm <sup>-1</sup> )                 | 7.080                              |
| Crystal size (mm <sup>3</sup> )           | 0.01 x 0.01 x 0.01                 |
| $\theta$ range (deg)                      | 2.078 to 30.739                    |
| Index ranges                              | -9<=h<=7<br>-8<=k<=8<br>-42<=l<=54 |
| F(000)                                    | 1712                               |
| Reflections collected/unique              | 8811 / 4583                        |
| $R_{\text{int}}$                          | 0.0293                             |
| $R/wR$ ( $I > 2 \sigma(I)$ )              | $R_1 = 0.0381$ , $wR_2 = 0.0808$   |
| $R/wR$ (all data)                         | $R_1 = 0.0553$ , $wR_2 = 0.0851$   |
| GOF on $F^2$                              | 1.003                              |

$${}^a R_1 = \sum ||F_o| - |F_c|| / \sum |F_o| \quad {}^b wR_2(F_o^2) = [\sum w(F_o^2 - F_c^2)^2 / \sum w(F_o^2)^2]^{1/2}$$

**Table S2.** Atomic coordinates ( $\times 10^4$ ) and equivalent isotropic displacement parameters ( $\text{\AA}^2 \times 10^3$ ) for  $\gamma\text{-P}_4\text{S}_3\text{I}_2$

| Atom | x        | y        | z       | U(eq) |
|------|----------|----------|---------|-------|
| I(1) | -491(1)  | -3776(1) | 5758(1) | 50(1) |
| I(2) | 5192(1)  | 11550(1) | 4246(1) | 50(1) |
| I(3) | 6683(1)  | 3001(1)  | 5247(1) | 51(1) |
| I(4) | 12046(2) | 4485(2)  | 4787(1) | 60(1) |
| S(1) | 6330(5)  | 6853(5)  | 4098(1) | 45(1) |
| S(2) | 4199(5)  | -2732(5) | 5911(1) | 45(1) |
| S(3) | 8466(5)  | 8469(5)  | 4770(1) | 47(1) |
| S(4) | 2690(5)  | -502(5)  | 5237(1) | 48(1) |
| S(5) | 11235(5) | 7751(6)  | 4123(1) | 55(1) |
| S(6) | 3410(6)  | 2182(5)  | 5900(1) | 55(1) |
| P(1) | 7368(5)  | 9449(5)  | 3968(1) | 39(1) |
| P(2) | 5109(5)  | -1361(5) | 5462(1) | 42(1) |
| P(3) | 1638(5)  | -1622(5) | 6036(1) | 42(1) |
| P(4) | 5936(5)  | 1096(5)  | 5750(1) | 42(1) |
| P(5) | 9557(5)  | 9806(5)  | 4346(1) | 45(1) |
| P(6) | 1350(5)  | 587(5)   | 5660(1) | 48(1) |
| P(7) | 7686(5)  | 6003(5)  | 4549(1) | 45(1) |
| P(8) | 10207(5) | 5213(5)  | 4277(1) | 46(1) |

**Table S3.** Selected bond lengths [Å] and angles [deg.] for  $\gamma$ -P<sub>4</sub>S<sub>3</sub>I<sub>2</sub>

|                |            |                |            |
|----------------|------------|----------------|------------|
| I(1)-P(3)      | 2.477(4)   | P(4)-S(6)-P(6) | 107.08(19) |
| I(2)-P(1)      | 2.473(3)   | S(1)-P(1)-I(2) | 102.94(16) |
| I(3)-P(4)      | 2.480(3)   | S(1)-P(1)-P(5) | 102.06(18) |
| I(4)-P(8)      | 2.471(3)   | P(5)-P(1)-I(2) | 95.79(16)  |
| S(1)-P(1)      | 2.114(5)   | S(2)-P(2)-P(4) | 92.85(18)  |
| S(1)-P(7)      | 2.123(5)   | S(4)-P(2)-S(2) | 103.06(19) |
| S(2)-P(2)      | 2.135(5)   | S(4)-P(2)-P(4) | 101.8(2)   |
| S(2)-P(3)      | 2.106(5)   | S(2)-P(3)-I(1) | 102.37(17) |
| S(3)-P(5)      | 2.089(5)   | S(2)-P(3)-P(6) | 102.45(19) |
| S(3)-P(7)      | 2.088(5)   | P(6)-P(3)-I(1) | 96.60(16)  |
| S(4)-P(2)      | 2.082(5)   | S(6)-P(4)-I(3) | 101.75(17) |
| S(4)-P(6)      | 2.087(5)   | S(6)-P(4)-P(2) | 102.12(19) |
| S(5)-P(5)      | 2.136(5)   | P(2)-P(4)-I(3) | 96.58(15)  |
| S(5)-P(8)      | 2.100(5)   | S(3)-P(5)-S(5) | 102.4(2)   |
| S(6)-P(4)      | 2.102(5)   | S(3)-P(5)-P(1) | 101.5(2)   |
| S(6)-P(6)      | 2.132(6)   | S(5)-P(5)-P(1) | 93.4(2)    |
| P(1)-P(5)      | 2.202(5)   | S(4)-P(6)-S(6) | 103.1(2)   |
| P(2)-P(4)      | 2.212(5)   | S(4)-P(6)-P(3) | 101.8(2)   |
| P(3)-P(6)      | 2.202(5)   | S(6)-P(6)-P(3) | 92.30(19)  |
| P(7)-P(8)      | 2.211(5)   | S(1)-P(7)-P(8) | 93.98(19)  |
| P(1)-S(1)-P(7) | 107.19(19) | S(3)-P(7)-S(1) | 102.7(2)   |
| P(3)-S(2)-P(2) | 106.73(19) | S(3)-P(7)-P(8) | 101.4(2)   |
| P(7)-S(3)-P(5) | 100.45(19) | S(5)-P(8)-I(4) | 103.25(18) |
| P(2)-S(4)-P(6) | 100.41(19) | S(5)-P(8)-P(7) | 101.9(2)   |
| P(8)-S(5)-P(5) | 107.5(2)   | P(7)-P(8)-I(4) | 97.19(15)  |

**Table S4.** Anisotropic Displacement Parameters ( $\text{Å}^2 \times 10^3$ ) for  $\gamma$ -P<sub>4</sub>S<sub>3</sub>I<sub>2</sub>.

The Anisotropic displacement factor exponent takes the form:  $-2 \pi^2 [h^2 a^{*2} U_{11} + 2hka^*b^* U_{12} + \dots]$ .

| Atom | U <sub>11</sub> | U <sub>22</sub> | U <sub>33</sub> | U <sub>23</sub> | U <sub>13</sub> | U <sub>12</sub> |
|------|-----------------|-----------------|-----------------|-----------------|-----------------|-----------------|
| I(1) | 43(1)           | 51(1)           | 56(1)           | 2(1)            | -4(1)           | -12(1)          |
| I(2) | 49(1)           | 45(1)           | 58(1)           | -7(1)           | -4(1)           | 11(1)           |
| I(3) | 55(1)           | 50(1)           | 49(1)           | 8(1)            | -2(1)           | -16(1)          |
| I(4) | 60(1)           | 57(1)           | 61(1)           | 1(1)            | -9(1)           | 21(1)           |
| S(1) | 38(2)           | 42(2)           | 56(2)           | -3(1)           | -5(1)           | -3(2)           |
| S(2) | 37(2)           | 40(2)           | 60(2)           | 14(1)           | 1(1)            | 2(2)            |
| S(3) | 51(2)           | 57(2)           | 34(2)           | -4(1)           | 0(1)            | 9(2)            |

|      |       |       |       |        |       |       |
|------|-------|-------|-------|--------|-------|-------|
| S(4) | 52(2) | 54(2) | 38(2) | 4(1)   | -8(2) | -8(2) |
| S(5) | 39(2) | 60(2) | 66(2) | 16(2)  | 17(2) | 6(2)  |
| S(6) | 61(2) | 41(2) | 63(2) | -13(2) | 12(2) | -6(2) |
| P(1) | 42(2) | 37(2) | 38(2) | 3(1)   | 2(1)  | 6(2)  |
| P(2) | 39(2) | 39(2) | 47(2) | -2(1)  | 8(1)  | 3(2)  |
| P(3) | 38(2) | 40(2) | 48(2) | -4(1)  | 3(1)  | -4(2) |
| P(4) | 43(2) | 43(2) | 39(2) | 4(1)   | -4(1) | -6(2) |
| P(5) | 39(2) | 38(2) | 60(2) | 3(2)   | -3(2) | -5(2) |
| P(6) | 35(2) | 42(2) | 67(2) | 5(2)   | -2(2) | 6(2)  |
| P(7) | 41(2) | 41(2) | 53(2) | 11(1)  | 6(1)  | -1(2) |
| P(8) | 50(2) | 41(2) | 47(2) | -4(1)  | -2(2) | 11(2) |

**Table S5.** Powder Laser Damage Threshold (LDT) Measurements

| Compounds                                              | Energy (mJ) | Spot area (cm <sup>2</sup> ) | Pulse width (ns) | LDT (MW/cm <sup>2</sup> ) |
|--------------------------------------------------------|-------------|------------------------------|------------------|---------------------------|
| $\gamma$ -P <sub>4</sub> S <sub>3</sub> l <sub>2</sub> | 1.7         | 0.0153938                    | 10               | 11.97286                  |
| AgGaS <sub>2</sub>                                     | 0.6         | 0.0153938                    | 10               | 4.25241                   |
